# Supplementary material for: Brief communication: Potential of satellite optical imagery to monitor glacier surface flow velocity variability in the tropical Andes
Source: Copernicus journal article supplement (doi:10.5194/egusphere-2024-2662), 2024-09-12
Supplement: Supplementary file 1 [file egusphere-2024-2662-supplement.pdf]

# **Supplementary Information for: Potential of satellite optical imagery to monitor glacier surface flow velocity variability in the tropical Andes**

Etienne Ducasse<sup>1</sup>, Romain Millan<sup>1</sup>, Jonas Kvist Andersen<sup>2</sup> and Antoine Rabatel<sup>1</sup>

5 <sup>1</sup>Univ. Grenoble Alpes, CNRS, IRD, INRAE, Grenoble-INP, IGE (UMR 5001), 38000 Grenoble, France

<sup>2</sup>Department of Geosciences and Natural Resource Management, University of Copenhagen, Copenhagen K, Denmark

## Supplementary Figures

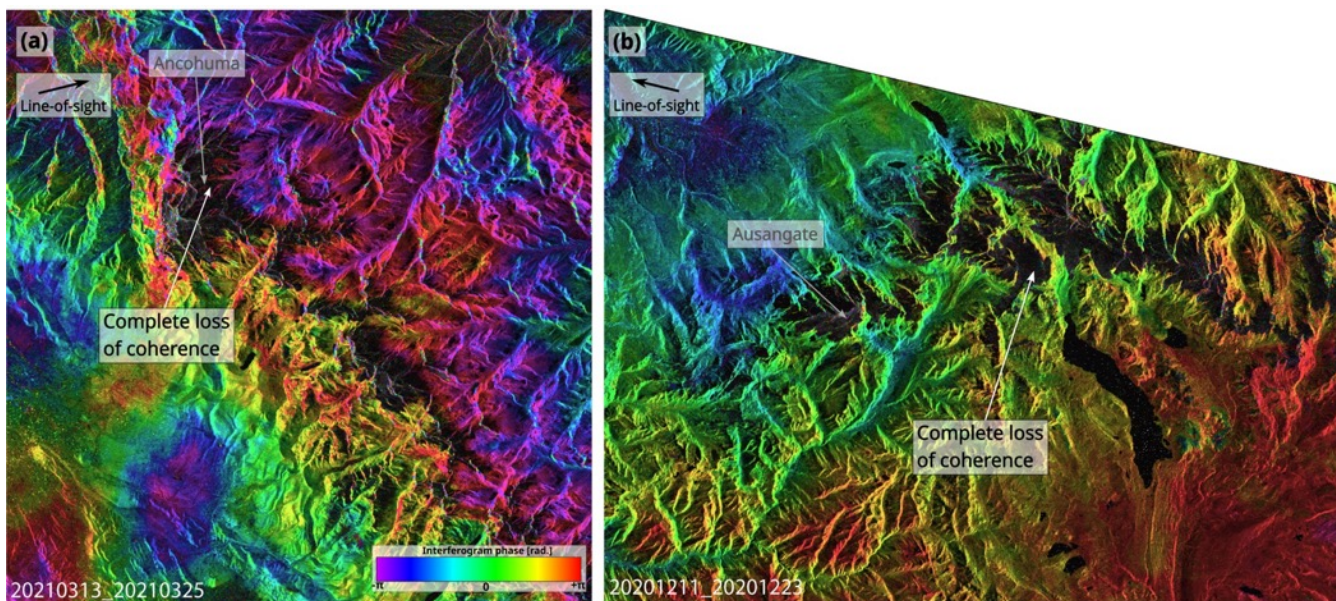

10 **Figure S1:** Examples of interferograms constructed over the Ancohuma and Ausangate regions in March 2021 (a), and January 2020 (b).

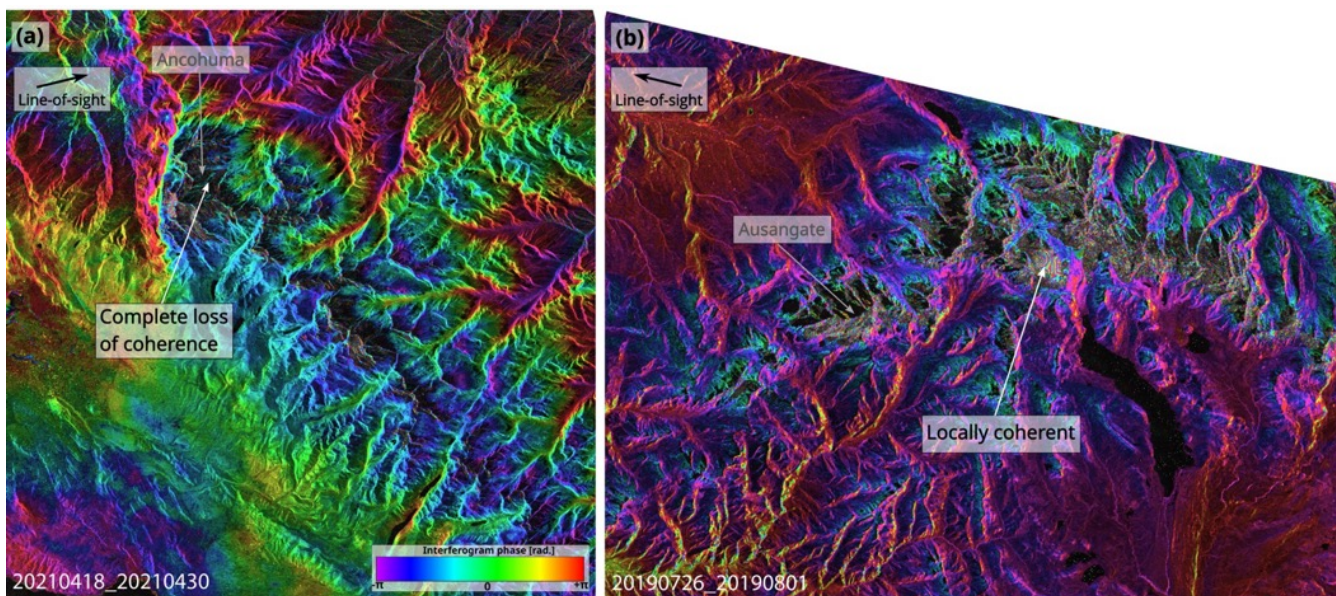

**Figure S2:** Examples of interferograms constructed over the Ancohuma and Ausangate regions in April 2021 (a), and July/August 2019 (b).
